# Supplementary material for: Ti–Sn–O composite oxides coated with N-doped carbon exhibiting enhanced lithium storage performance
Source: Royal Society of Chemistry journal article supplement (doi:10.1039/c5nj02006a), 2015-10-30
Supplement: c5nj02006a1.pdf [file c5nj02006a1.pdf]

## Supporting Information

### **Ti-Sn-O Composite Oxides Coated with N-doped Carbon Exhibiting Enhanced Lithium Storage Performance**

Liu-Xia Zhang<sup>1</sup>, Tao Li<sup>1</sup>, Rui-Lin Bai<sup>2</sup>, Yong-Xin Qi<sup>1</sup>, Ning Lun<sup>\*1</sup>, Yu-Jun Bai<sup>\*1</sup>

<sup>1</sup>Key Laboratory for Liquid–Solid Structural Evolution and Processing of Materials  
(Ministry of Education), Shandong University, Jinan 250061, People’s Republic of  
China

<sup>2</sup> Shandong Experimental High School, Jinan 250001, People’s Republic of China

\* Corresponding author. Tel/Fax: +86 531 88392315. E-mail address:  
byj97@126.com (Y.-J. Bai); lunning66@sdu.edu.cn (N. Lun).

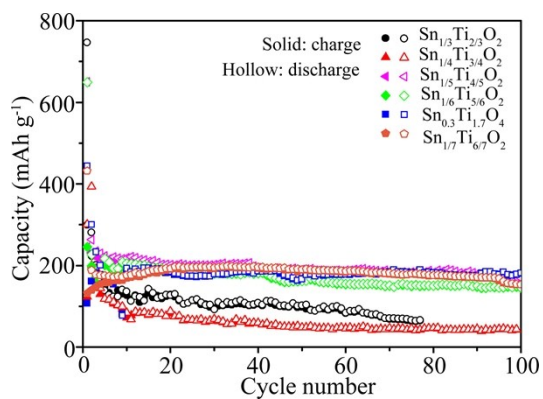

**Fig. S1** Cycling performance at 100 mA g<sup>-1</sup> for the carbon-coated Sn<sub>1/3</sub>Ti<sub>2/3</sub>O<sub>2</sub>, Sn<sub>1/4</sub>Ti<sub>3/4</sub>O<sub>2</sub>, Sn<sub>1/5</sub>Ti<sub>4/5</sub>O<sub>2</sub>, Sn<sub>1/6</sub>Ti<sub>5/6</sub>O<sub>2</sub>, Sn<sub>0.3</sub>Ti<sub>1.7</sub>O<sub>4</sub> and Sn<sub>1/7</sub>Ti<sub>6/7</sub>O<sub>2</sub> using glucose as the carbon source.

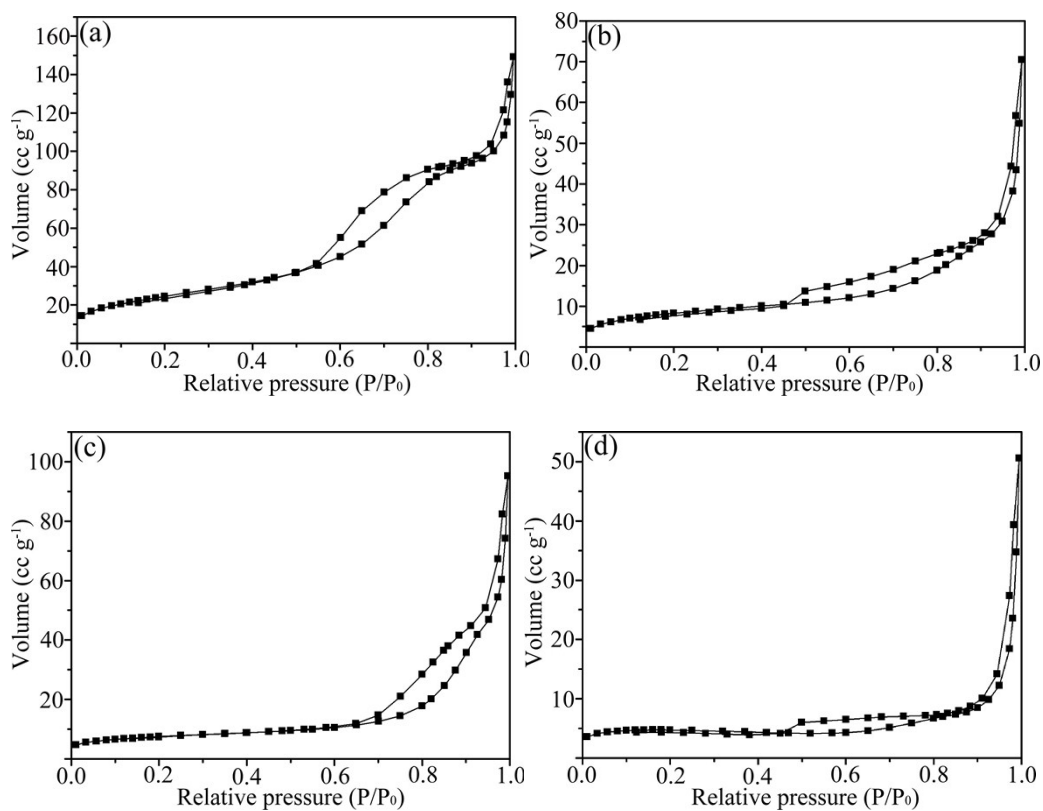

**Fig. S2** Nitrogen adsorption/desorption isotherms of (a) S1-400, (b) S1-400C1, (c) S1-600C1, (d) S1-400C2.

Table S1 The  $R_{ct}$  values of S1-400C1 charging at 100 mA g<sup>-1</sup> and 500 mA g<sup>-1</sup> for different cycles.

| Current density<br>/ mA g <sup>-1</sup> | $R_{ct}$ ( $\Omega$ ) after various cycles |      |      |      |      |      |
|-----------------------------------------|--------------------------------------------|------|------|------|------|------|
|                                         | 0                                          | 5    | 25   | 50   | 100  | 200  |
| 100                                     | —                                          | 153. | 264. | 624. | 364. | 57.5 |
| 500                                     | 107                                        | 101. | 78.7 | 74.2 | 62.9 | 67.1 |
